# Supplementary material for: A cassava protoplast system for screening genes associated with the response to South African cassava mosaic virus
Source: Virol J. 2020 Nov 23;17:184. doi: 10.1186/s12985-020-01453-4 (PMC7685591; doi:10.1186/s12985-020-01453-4)
Supplement: Supplementary file 2 — Additional file 2: ANOVA and Tukey's HSD analyses of qPCR data. [file 12985_2020_1453_MOESM2_ESM.xlsx]

## Sheet: SACMV qPCR
ANOVA and TUKEY's HSD tests on raw CP values
Additional File 2	A Cassava Protoplast System for Screening Genes Associated with the Response to South African Cassava Mosaic Virus.
Statistical analyses of qPCR data								V - SACMV-transformed
p<0.05								VC - SACMV- and CRISPR-transformed
SACMV DNA accumulation qPCR
	ANOVA							TUKEY'S HSD
	Source	DF	Sum of Square	Mean Square	F Statistic	P-value		Pair	Difference	SE	Q	Lower CI	Upper CI	Critical Mean	p-value	Group	VC
cv.60444 Trial 1	Groups (between groups)	1	3.969068	3.969068	80.156415	0.000860975		V-VC	1.626667	0.128474	12.661470	1.122214	2.131120	0.504453	0.000863176	V	1.63
	Error (within groups)	4	0.198066	0.0495165
	Total	5	4.167134	0.833427
cv.60444 Trial 2	Groups (between groups)	1	0.000600000	0.000600000	0.00438437	0.950384		V-VC	0.0200000	0.213580	0.0936415	-0.818624	0.858624	0.838624	0.950384	V	0.020
	Error (within groups)	4	0.547399	0.136850
	Total	5	0.547999	0.109600
cv.60444 Trial 3	Groups (between groups)	1	3.360018	3.360018	58.367475	0.00157676		V-VC	1.496667	0.138524	10.804395	0.952752	2.040582	0.543915	0.00157857	V	1.50
	Error (within groups)	4	0.230266	0.0575666
	Total	5	3.590285	0.718057
T200 Trial 1	Groups (between groups)	1	2.208265	2.208265	84.070597	0.000785571		V-VC	1.213333	0.0935714	12.966927	0.845925	1.580741	0.367408	0.000787840	V	1.21
	Error (within groups)	4	0.105067	0.0262668
	Total	5	2.313333	0.462667
T200 Trial 2	Groups (between groups)	1	1.560600	1.560600	117.045457	0.000414097		V-VC	1.018333	0.0860527	11.833832	0.631039	1.405627	0.387294	0.00357890	V	1.02
	Error (within groups)	4	0.0533331	0.0133333
	Total	5	1.613933	0.322787
T200 Trial 3	Groups (between groups)	1	0.0240668	0.0240668	0.0534027	0.828584		V-VC	0.126667	0.387585	0.326811	-1.395186	1.648520	1.521853	0.828584	V	0.13
	Error (within groups)	4	1.802665	0.450666
	Total	5	1.826732	0.365346
TME3 Trial 1	Groups (between groups)	1	1.622400	1.622400	72.428606	0.00104563		V-VC	1.040000	0.0864099	12.035664	0.700711	1.379289	0.339289	0.00104770	V	1.04
	Error (within groups)	4	0.0896000	0.0224000
	Total	5	1.712000	0.342400
TME3 Trial 2	Groups (between groups)	1	4.860000	4.860000	228.346819	0.000111786		V-VC	1.800000	0.0842287	21.370392	1.469276	2.130724	0.330724	0.000117057	V	1.80
	Error (within groups)	4	0.0851337	0.0212834
	Total	5	4.945134	0.989027
TME3 Trial 3	Groups (between groups)	1	0.552067	0.552067	10.145194	0.0333704		V-VC	0.606667	0.134681	4.504485	0.0778430	1.135491	0.528824	0.0333711	V	0.61
	Error (within groups)	4	0.217667	0.0544166
	Total	5	0.769734	0.153947

## Sheet: MeE3L qPCR
p<0.05									UT - untransformed			C - CRISPR-transformed
MeE3L expression qPCR									V - SACMV-transformed			VC - SACMV- and CRISPR-transformed
	ANOVA							TUKEY'S HSD
	Source	DF	Sum of Square	Mean Square	F Statistic	P-value		Pair	Difference	SE	Q	Lower CI	Upper CI	Critical Mean	p-value	Group	V	C	VC
cv.60444 Trial 1	Groups (between groups)	3	5.130467	1.710156	35.140211	0.0000591660		UT-V	0.303334	0.127366	2.381585	-0.273484	0.880152	0.576818	0.390296	UT	0.30	1.44	1.45
	Error (within groups)	8	0.389333	0.0486666				UT-C	1.436667	0.127366	11.279792	0.859849	2.013485	0.576818	0.000205558	V	0.0	1.13	1.14
	Total	11	5.519800	0.501800				UT-VC	1.446667	0.127366	11.358306	0.869849	2.023485	0.576818	0.000195631	C	1.13	0.0	0.010
								V-C	1.133333	0.127366	8.898207	0.556515	1.710151	0.576818	0.00106117
								V-VC	1.143333	0.127366	8.976721	0.566515	1.720151	0.576818	0.00100056
								C-VC	0.0100000	0.127366	0.0785136	-0.566818	0.586818	0.576818	0.999933
cv.60444 Trial 2	Groups (between groups)	3	57.105623	19.035208	17.691811	0.000685372		UT-V	1.916667	0.598869	3.200476	-0.795498	4.628832	2.712165	0.186219	UT	1.92	5.25	4.95
	Error (within groups)	8	8.607466	1.075933				UT-C	5.250000	0.598869	8.766521	2.537835	7.962165	2.712165	0.00117212	V	0.0	3.33	3.03
	Total	11	65.713089	5.973917				UT-VC	4.950000	0.598869	8.265577	2.237835	7.662165	2.712165	0.00172676	C	3.33	0.0	0.30
								V-C	3.333333	0.598869	5.566044	0.621168	6.045498	2.712165	0.0181550
								V-VC	3.033333	0.598869	5.065100	0.321168	5.745498	2.712165	0.0294500
								C-VC	0.300000	0.598869	0.500944	-2.412165	3.012165	2.712165	0.983668
cv.60444 Trial 3	Groups (between groups)	3	34.329174	11.443058	9.230609	0.0114977		UT-V	2.866667	0.642829	4.459457	-0.280365	6.013699	3.147032	0.0717021	UT	2.87	3.83	4.92
	Error (within groups)	6	7.438117	1.239686				UT-C	3.830000	0.718704	5.329034	0.311512	7.348488	3.518488	0.0352876	V	0.0	0.96	2.06
	Total	9	41.767291	4.640810				UT-VC	4.925000	0.718704	6.852609	1.406512	8.443488	3.518488	0.0113344	C	0.96	0.0	1.09
								V-C	0.963333	0.718704	1.340375	-2.555155	4.481821	3.518488	0.782094
								V-VC	2.058333	0.718704	2.863950	-1.460155	5.576821	3.518488	0.276771
								C-VC	1.095000	0.787301	1.390827	-2.759311	4.949311	3.854311	0.763934
T200 Trial 1	Groups (between groups)	3	18.099250	6.033083	1.105127	0.444657		UT-V	2.095000	1.652146	1.268047	-7.416504	11.606504	9.511504	0.808332	UT	2.09	2.14	0.31
	Error (within groups)	4	21.836704	5.459176				UT-C	2.140000	1.652146	1.295285	-7.371504	11.651504	9.511504	0.799273	V	0.0	4.23	1.78
	Total	7	39.935954	5.705136				UT-VC	0.315000	1.652146	0.190661	-9.196504	9.826504	9.511504	0.998978	C	4.23	0.0	2.45
								V-C	4.235000	1.652146	2.563332	-5.276504	13.746504	9.511504	0.385043
								V-VC	1.780000	1.652146	1.077386	-7.731504	11.291504	9.511504	0.867863
								C-VC	2.455000	1.652146	1.485946	-7.056504	11.966504	9.511504	0.733368
T200 Trial 2	Groups (between groups)	3	51.317083	17.105694	3.555057	0.0871260		UT-V	5.885000	1.551072	3.794149	-1.708429	13.478429	7.593429	0.125979	UT	5.88	6.06	4.38
	Error (within groups)	6	28.869910	4.811652				UT-C	6.060000	1.415929	4.279876	-0.871821	12.991821	6.931821	0.0833756	V	0.0	0.18	1.50
	Total	9	80.186993	8.909666				UT-VC	4.383333	1.415929	3.095729	-2.548488	11.315154	6.931821	0.228227	C	0.18	0.0	1.68
								V-C	0.175000	1.415929	0.123594	-6.756821	7.106821	6.931821	0.999733
								V-VC	1.501667	1.415929	1.060552	-5.430154	8.433488	6.931821	0.873666
								C-VC	1.676667	1.266445	1.323916	-4.523342	7.876676	6.200009	0.787933
T200 Trial 3	Groups (between groups)	3	0.293700	0.0979000	2.217439	0.163640		UT-V	0.206667	0.121312	1.703595	-0.342733	0.756067	0.549400	0.641044	UT	0.21	0.38	0.38
	Error (within groups)	8	0.353200	0.0441500				UT-C	0.380000	0.121312	3.132412	-0.169400	0.929400	0.549400	0.198742	V	0.0	0.17	0.17
	Total	11	0.646900	0.0588091				UT-VC	0.380000	0.121312	3.132412	-0.169400	0.929400	0.549400	0.198742	C	0.17	0.0	0.0
								V-C	0.173333	0.121312	1.428817	-0.376067	0.722733	0.549400	0.748331
								V-VC	0.173333	0.121312	1.428817	-0.376067	0.722733	0.549400	0.748331
								C-VC	0.00000	0.121312	0.00000	-0.549400	0.549400	0.549400	1.000000
TME3 Trial 1	Groups (between groups)	3	4125.133199	1375.044400	5.465110	0.00884560		UT-V	1.333333	7.239995	0.184162	-27.960362	30.627028	29.293695	0.999177	UT	1.33	33.67	11.83
	Error (within groups)	16	4025.666625	251.604164				UT-C	33.666666	6.475649	5.198964	7.465588	59.867744	26.201078	0.00989911	V	0.0	32.33	10.50
	Total	19	8150.799824	428.989464				UT-VC	11.833333	7.239995	1.634439	-17.460362	41.127028	29.293695	0.661870	C	32.33	0.0	21.83
								V-C	32.333333	7.239995	4.465933	3.039638	61.627028	29.293695	0.0280322
								V-VC	10.500000	7.931018	1.323916	-21.589635	42.589635	32.089635	0.786178
								C-VC	21.833333	7.239995	3.015656	-7.460362	51.127028	29.293695	0.185063
TME3 Trial 2	Groups (between groups)	3	51.589839	17.196613	9.999540	0.00633241		UT-V	1.051667	0.846498	1.242374	-2.911022	5.014356	3.962689	0.816030	UT	1.05	0.37	4.62
	Error (within groups)	7	12.038183	1.719740				UT-C	0.373333	0.757131	0.493089	-3.171004	3.917670	3.544337	0.984253	V	0.0	1.43	5.67
	Total	10	63.628022	6.362802				UT-VC	4.620000	0.757131	6.101985	1.075663	8.164337	3.544337	0.0143702	C	1.43	0.0	4.25
								V-C	1.425000	0.846498	1.683407	-2.537689	5.387689	3.962689	0.651150
								V-VC	5.671667	0.846498	6.700156	1.708978	9.634356	3.962689	0.00880841
								C-VC	4.246667	0.757131	5.608896	0.702330	7.791004	3.544337	0.0218718
TME3 Trial 3	Groups (between groups)	3	47.335637	15.778546	15.807990	0.0110460		UT-V	5.210000	0.706448	7.374924	1.142938	9.277062	4.067062	0.0217921	UT	5.21	6.47	4.28
	Error (within groups)	4	3.992550	0.998137				UT-C	6.475000	0.706448	9.165573	2.407938	10.542062	4.067062	0.0100291	V	0.0	1.27	0.93
	Total	7	51.328187	7.332598				UT-VC	4.280000	0.706448	6.058479	0.212938	8.347062	4.067062	0.0423760	C	1.27	0.0	2.20
								V-C	1.265000	0.706448	1.790649	-2.802062	5.332062	4.067062	0.624934
								V-VC	0.930000	0.706448	1.316445	-3.137062	4.997062	4.067062	0.792159
								C-VC	2.195000	0.706448	3.107094	-1.872062	6.262062	4.067062	0.266138
